# Supplementary material for: Interplay between coding and non-coding regulation drives the Arabidopsis seed-to-seedling transition
Source: PubMed Central journal article supplement (PMC10897432; doi:10.1038/s41467-024-46082-5), 2024-02-26
Supplement: 41467_2024_46082_MOESM3_ESM.pdf [file 41467_2024_46082_MOESM3_ESM.pdf]

## **Description of Additional Supplementary Files:**

**Supplementary Dataset 1:** TSS annotation and quantification.

**Supplementary Dataset 2:** ACR annotation and quantification.

**Supplementary Dataset 3:** csRNA-seq differential expression analyses.

**Supplementary Dataset 4:** csRNA-seq clustering and GO enrichment.

**Supplementary Dataset 5:** RNA-seq clustering and GO enrichment.

**Supplementary Dataset 6:** ATAC-seq clustering and GO enrichment.

**Supplementary Dataset 7:** TomTom similarity between de novo motifs and known transcription factor binding sites.

**Supplementary Dataset 8:** Protein coding genes with detected antisense TSSs in the csRNA-seq.

**Supplementary Dataset 9:** Detected bidirectional promoters in the csRNA-seq.

**Supplementary Dataset 10:** Detected enhancers and their activity during the seedto-seedling transition.
